related to aviation medicine. The contents are presented in ten groups, including an introduction, an interesting bibliography, a short, incomplete glossary of abbreviations, and an indispensable index key to collections of aviation artifacts. The main text consists, in order, of annotated lists of goggles and helmets, flying clothing, protective garments, oxygen masks and regulators, flight medical equipment, survival and rescue gear. In 122 pages of text there are 83 black-and-white photographs, each accompanied by an explanatory text.

Many of the illustrations are the most interesting part of the book. Unfortunately, too many are of poor quality, showing insufficient detail to be of value, and have an accompanying text that adds nothing to the illustration. The positioning of photographs in relation to text is often confusing. Infuriatingly, the worst photographs are of static displays of collections still in existence. Surely, Dr. Benford could have insisted upon better illustrations. The best photographs, fortunately, are those that are unique, e.g., Wiley Post working with the pressure suit that enabled him to reach altitudes between 40,000 and 50,000 feet in 1934.

The introduction is well written, in fact, so stimulating that the rest of the book is a disappointment. For example: the introduction mentions "—the ingenious demand oxygen regulator used by the Luftwaffe between 1939 and 1941." However, there is no functional diagram of the regulator to show what was so "ingenious" about it; nor is there any description of temporary Allied equipment to allow an assessment of comparative operational effectiveness of such developments.

Naturally, much of the book deals with equipment developed in response to wartime operational needs. I would very much like to have seen a discussion about how each new development affected the ebb and flow of aerial combat, and how the physiologists, scientists and engineers working so much in the background responded to the challenges of operational needs.

Indeed, my main disappointment with the book is its failure to deal at all with the background of the medicine and physiology of aviation upon which are hung the artifacts catalogued in the book. Dr. Benford has merely produced a catalogue of artifacts, with sketchy, and in the main disappointing, annotations. A great pity, considering the fascinating opportunities offered by the field.

To my certain knowledge, the book is far from encyclopedic. For example, an excellent collection of appropriate artifacts is contained in the Aerospace Exhibit at the North Carolina Museum of Life and Science; particularly in the collection preserved from the work of Professor F. G. Hall, one of the pre-eminent aviation physiologists of the 1930's to 1950's. There is little value for the anesthesiologist unless he has an abiding interest in aviation, and then, I fear, he is bound to be disappointed. Certainly, as a reference text, it should be included in large library collections, but I would hesitate to recommend it for the more general reader.

JOHN N. MILLER, M.D.  
Department of Anesthesiology  
Duke University Medical Center  
Box 2094  
Durham, North Carolina 27710

### Books Received

| Title & Edition                                                                                                              | Author/Editor                              | Publisher                                                    |       |         |
|------------------------------------------------------------------------------------------------------------------------------|--------------------------------------------|--------------------------------------------------------------|-------|---------|
|                                                                                                                              |                                            | Address, Name, Year                                          | Pages | Price   |
| <b>Neurochemical Mechanisms of Opiates and Endorphins</b> (Advances in Biochemical Psychopharmacology, Volume 20)            | H. H. Loh<br>D. H. Ross<br>(Editors)       | New York<br>Raven Press<br>1979                              | 563   | \$39.00 |
| <i>Overviews narcotics research and studies actions and interactions of messengers, opiates and neurotransmitters.</i>       |                                            |                                                              |       |         |
| <b>Complications of Nervous System Trauma</b> (Advances in Neurology, Volume 22)                                             | R. A. Thompson<br>J. R. Green<br>(Editors) | New York<br>Raven Press<br>1979                              | 333   | \$29.50 |
| <i>Pathophysiology: medical and surgical management.</i>                                                                     |                                            |                                                              |       |         |
| <b>Pharmacology of Respiratory Therapy Medications</b>                                                                       | M. J. Strauch                              | Chicago<br>Year Book Medical Publishers, Inc.<br>1979        | 249   | PNS     |
| <i>Synoptic compendium designed to facilitate learning in the classroom and at the bedside.</i>                              |                                            |                                                              |       |         |
| <b>Lecture Notes on Anesthetics</b>                                                                                          | J. N. Lunn                                 | Oxford, England<br>Blackwell Scientific Publications<br>1979 | 170   | \$ 9.95 |
| <i>A syllabus of anesthetics for undergraduates; those parts which any doctor may need to know in his professional life.</i> |                                            |                                                              |       |         |
| <b>The Essentials of Respiratory Therapy</b>                                                                                 | R. M. Kacmarek<br>S. Dimas<br>C. W. Mack   | Chicago<br>Year Book Medical Publishers, Inc.<br>1979        | 359   | \$17.95 |
| <i>Essential aspects organized in outline.</i>                                                                               |                                            |                                                              |       |         |

Books Received (*Continued*)

| Title & Edition                                                                                                                                                             | Author/Editor                                  | Publisher                                             |  | Pages | Price             |
|-----------------------------------------------------------------------------------------------------------------------------------------------------------------------------|------------------------------------------------|-------------------------------------------------------|--|-------|-------------------|
|                                                                                                                                                                             |                                                | Address, Name, Year                                   |  |       |                   |
| <b>Management of Acute Intracranial Disasters</b>                                                                                                                           | R. V. Trubuhovich<br>(Editor)                  | Boston<br>Little, Brown & Co.<br>1979                 |  | 448   | \$35.00/<br>annum |
| <i>Diagnosis, management, special investigations.</i>                                                                                                                       |                                                |                                                       |  |       |                   |
| <b>Review of Physiological Chemistry</b><br>17th edition                                                                                                                    | H. A. Harper<br>V. W. Rodwell<br>P. A. Mayes   | Los Altos, Cal.<br>Lange Medical Publications<br>1979 |  | 702   | \$14.50           |
| <i>Comprehensive concise survey.</i>                                                                                                                                        |                                                |                                                       |  |       |                   |
| <b>Clinical Cardiology</b><br>Second edition                                                                                                                                | M. Sokolow<br>M. B. McIlroy                    | Los Altos, Cal.<br>Lange Medical Publications<br>1979 |  | 718   | \$17.50           |
| <i>A revision; the first edition was published in 1977.</i>                                                                                                                 |                                                |                                                       |  |       |                   |
| <b>Clinical Management of Mother and Newborn</b>                                                                                                                            | G. F. Marx<br>(Editor)                         | New York<br>Springer-Verlag<br>1979                   |  | 274   | \$29.80           |
| <i>Postpartum and postnatal physiology and pathophysiology correlated with clinical management by 18 specialists, of whom ten are anesthesiologists.</i>                    |                                                |                                                       |  |       |                   |
| <b>Coronary Heart Surgery</b>                                                                                                                                               | H. Roskamm<br>M. Schmuziger<br>(Editors)       | New York<br>Springer-Verlag<br>1979                   |  | 394   | \$42.90           |
| <i>Papers from a symposium. Includes a long article on anesthesia for coronary-artery surgery from the Mayo Clinic.</i>                                                     |                                                |                                                       |  |       |                   |
| <b>Neurotoxins: Tools in Neurobiology</b><br>(Advances in Cytopharmacology,<br>Volume 3)                                                                                    | B. Ceccarelli<br>F. Clementi<br>(Editors)      | New York<br>Raven Press<br>1979                       |  | 461   | PNS               |
| <i>Two introductory lectures and 39 research papers, including ten on acetylcholine receptors.</i>                                                                          |                                                |                                                       |  |       |                   |
| <b>Laboratory Exercises in Respiratory Therapy</b>                                                                                                                          | C. A. Shoup<br>R. N. McHenry                   | St. Louis<br>C. V. Mosby Company<br>1979              |  | 251   | \$10.95           |
| <i>Developed for a respiratory therapy school program.</i>                                                                                                                  |                                                |                                                       |  |       |                   |
| <b>Jamieson &amp; Kay's Textbook of Surgical Physiology</b> Third edition                                                                                                   | I. M. Ledingham<br>C. Mackay<br>(Editors)      | New York<br>Churchill Livingstone<br>1978             |  | 381   | \$47.50           |
| <i>Applied physiology of general surgery in 28 chapters, including fluid and electrolyte balance, respiratory system, the heart, circulation, blood, immunology, shock.</i> |                                                |                                                       |  |       |                   |
| <b>Principles and Practice of Blood-gas Analysis</b>                                                                                                                        | A. P. Adams<br>C. E. W. Hahn                   | London<br>Franklin Scientific Projects Ltd.<br>1979   |  | 95    | PNS               |
| <i>Why and how blood gases are measured . . . a thorough insight into the principles and practice of blood-gas analysis.</i>                                                |                                                |                                                       |  |       |                   |
| <b>Development of New Volatile Inhalation Anaesthetics</b> (Monographs in Anaesthesiology, Volume 6)                                                                        | A. B. Dobkin<br>(Editor)                       | Amsterdam<br>Elsevier/North Holland<br>1979           |  | 369   | \$70.25           |
| <i>History—halothane—azeotrope—methoxyflurane—enflurane—fluroxene—inhalational agents under investigation—biotransformation—toxicity in man—vaporizers—the future.</i>      |                                                |                                                       |  |       |                   |
| <b>Mechanisms of Pain and Analgesic Compounds</b> (Eleventh Miles International Symposium)                                                                                  | R. F. Beers, Jr.<br>E. G. Bassett<br>(Editors) | New York<br>Raven Press<br>1979                       |  | 496   | \$39.50           |
| <i>Proceedings of the Johns Hopkins Symposium. Includes discussions of neural mechanisms, endorphins, opioid analgesia, and new leads for analgesics.</i>                   |                                                |                                                       |  |       |                   |
